# Supplementary material for: Exclusion of NUMB Exon12 Controls Cancer Cell Migration through Regulation of Notch1-SMAD3 Crosstalk
Source: MDPI journal article supplement (doi:10.3390/ijms23084363), 2022-04-14
Supplement: s1 [file s1]

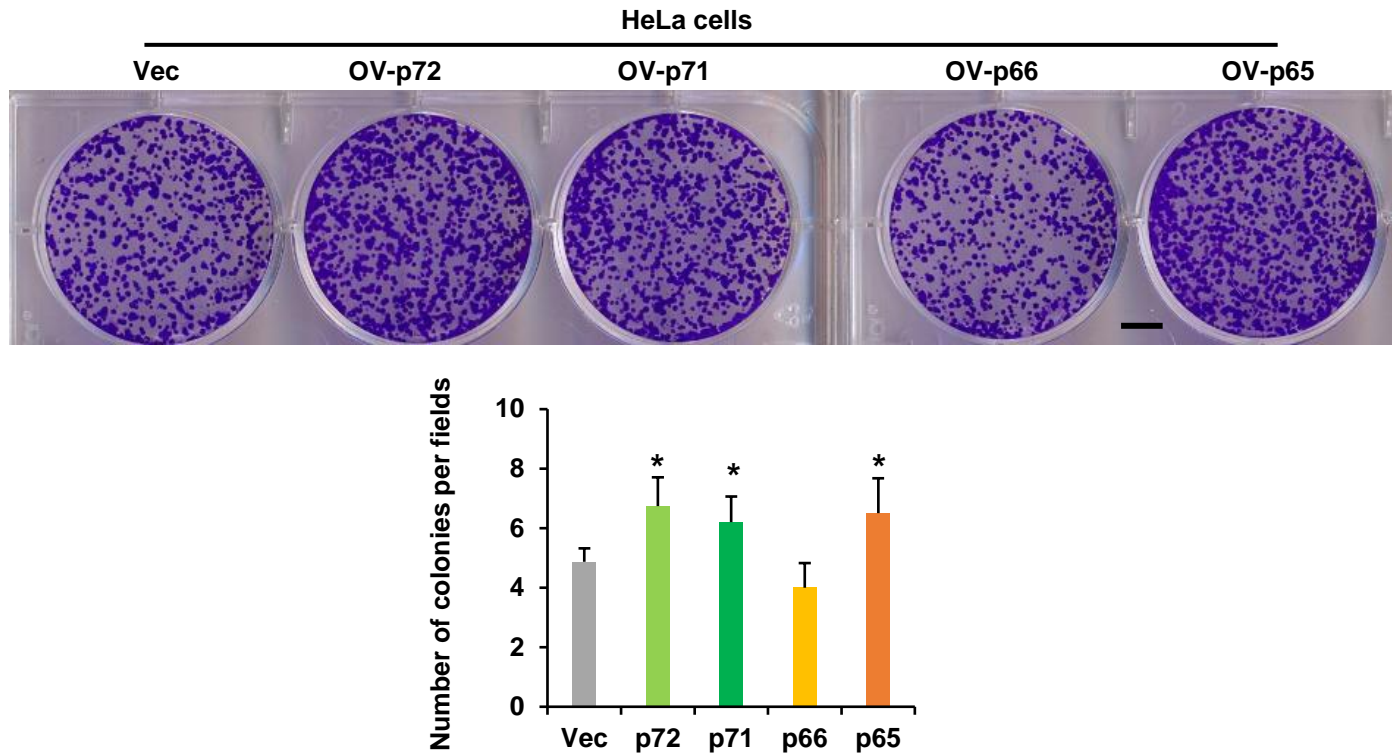

**Supplementary Figure S1. NUMB isoforms including p72, p71 and p65 promoted cancer cell proliferation.** Clonogenic survival assays were performed using cells described in Fig. 1B. The relative number of focal adhesions was quantified in the bar graph below. Scale bar is 500  $\mu$ m.

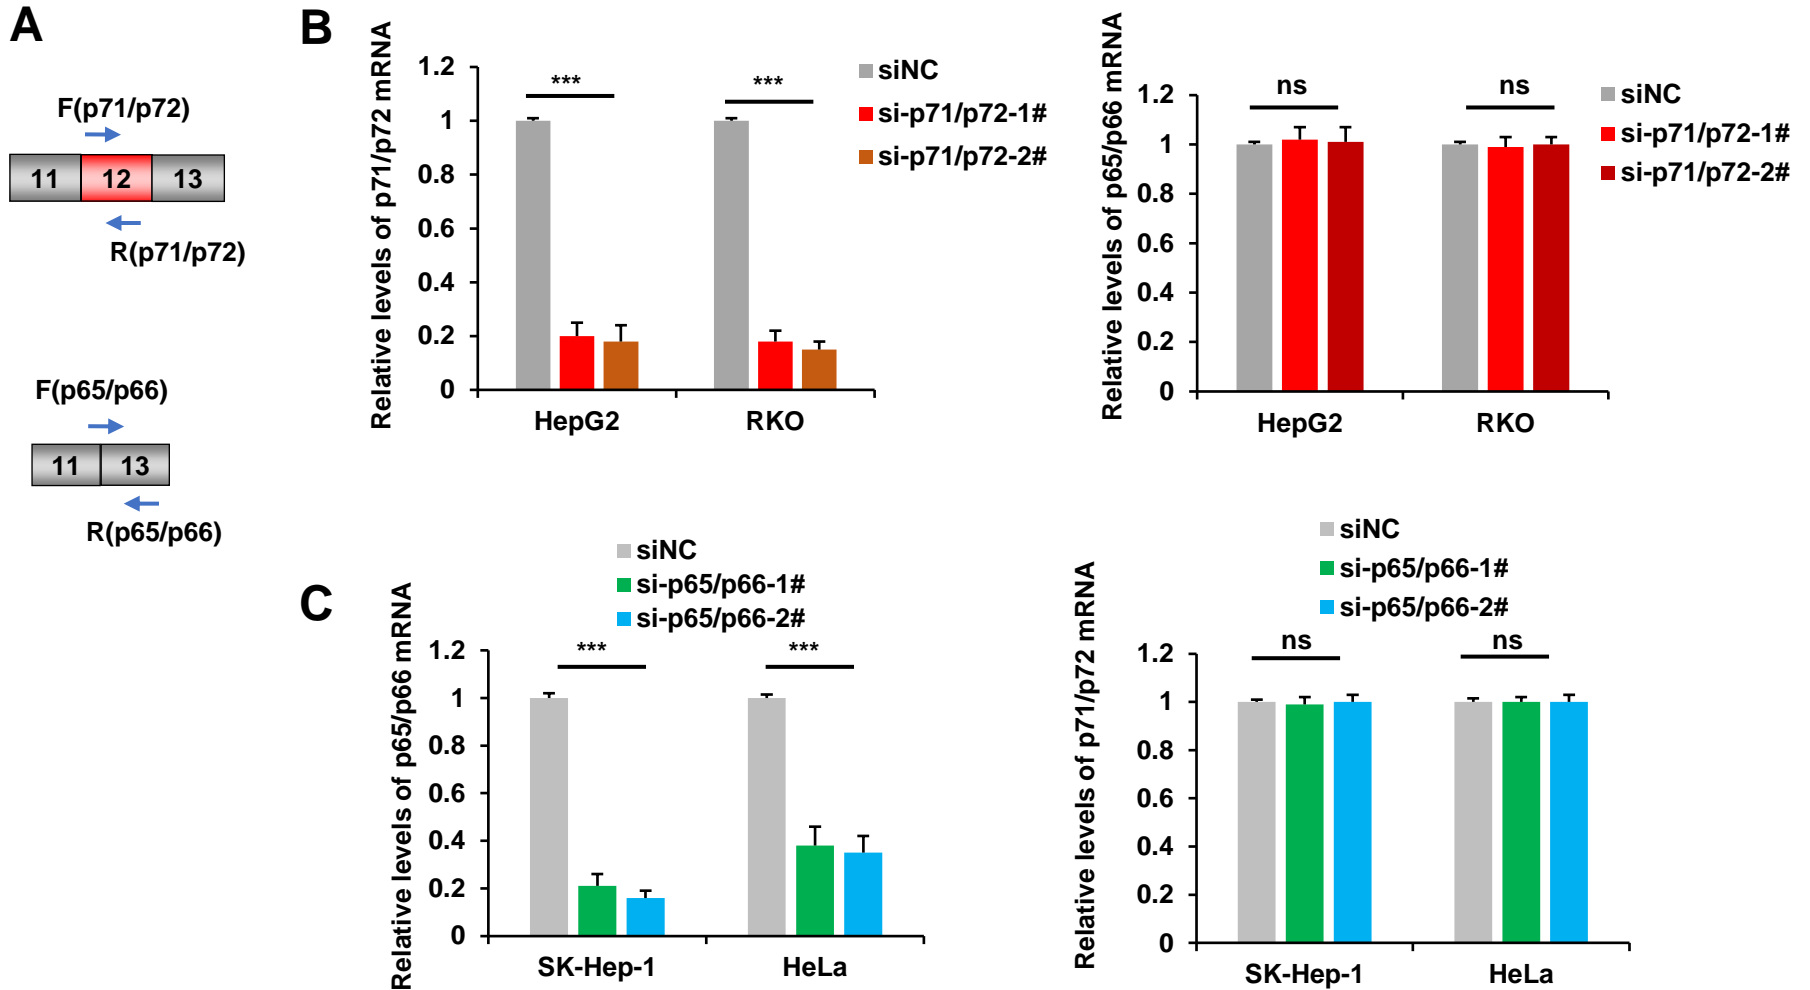

**Supplementary Figure S2. Knockdown specificity of NUMB isoforms examined by RT-qPCR.** (A) Illustration of primers used to specifically detect NUMB p71/p72 or NUMB p65/p66 variants. (B) HepG2 and RKO cells were transiently transfected with si-RNAs against p71/p72, followed by RT-qPCR analysis. Relative mRNA levels of p71/p72 or p65/p66 isoforms were shown, respectively. C. SK-Hep-1 and HeLa cells were transiently transfected with si-RNAs against p65/p66, followed by RT-qPCR analysis. Relative mRNA levels of p65/p66 or p71/p72 were shown, respectively.

**A**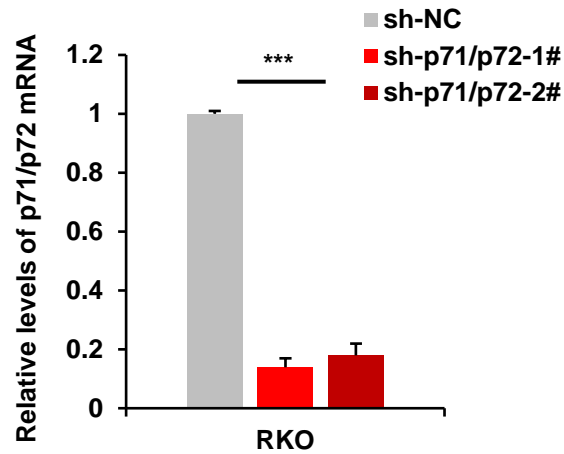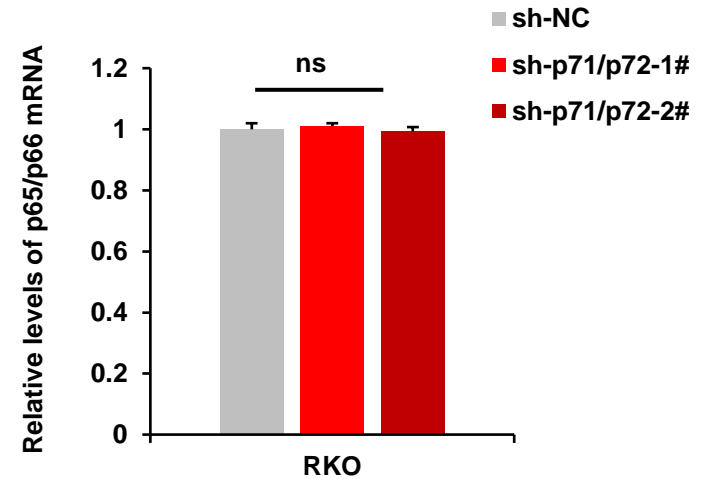**B**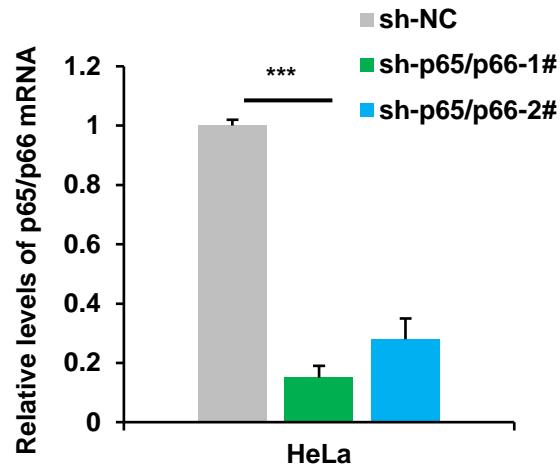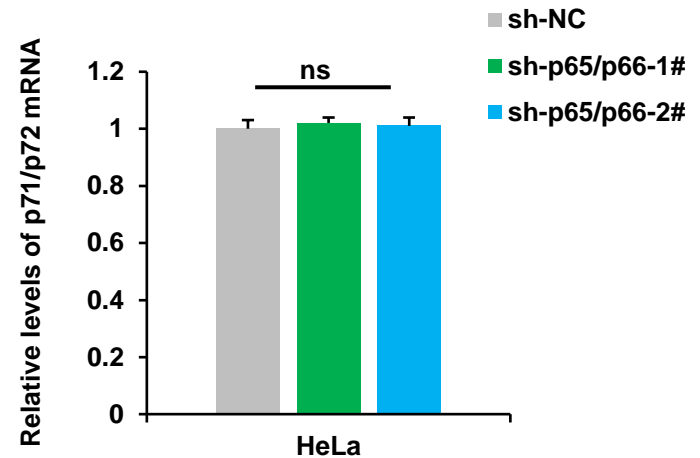

**Supplementary Figure S3. Knockdown specificity of NUMB isoforms examined by RT-qPCR.** (A) Relative mRNA levels of NUMB isoforms were compared between stable RKO cells expressing sh-p71/p72(1#, or 2#) and sh-NC expressing cells. (B) Relative mRNA levels of NUMB isoforms were compared between stable HeLa cells expressing sh-p65/p66(1# or 2#) and sh-NC expressing cells.

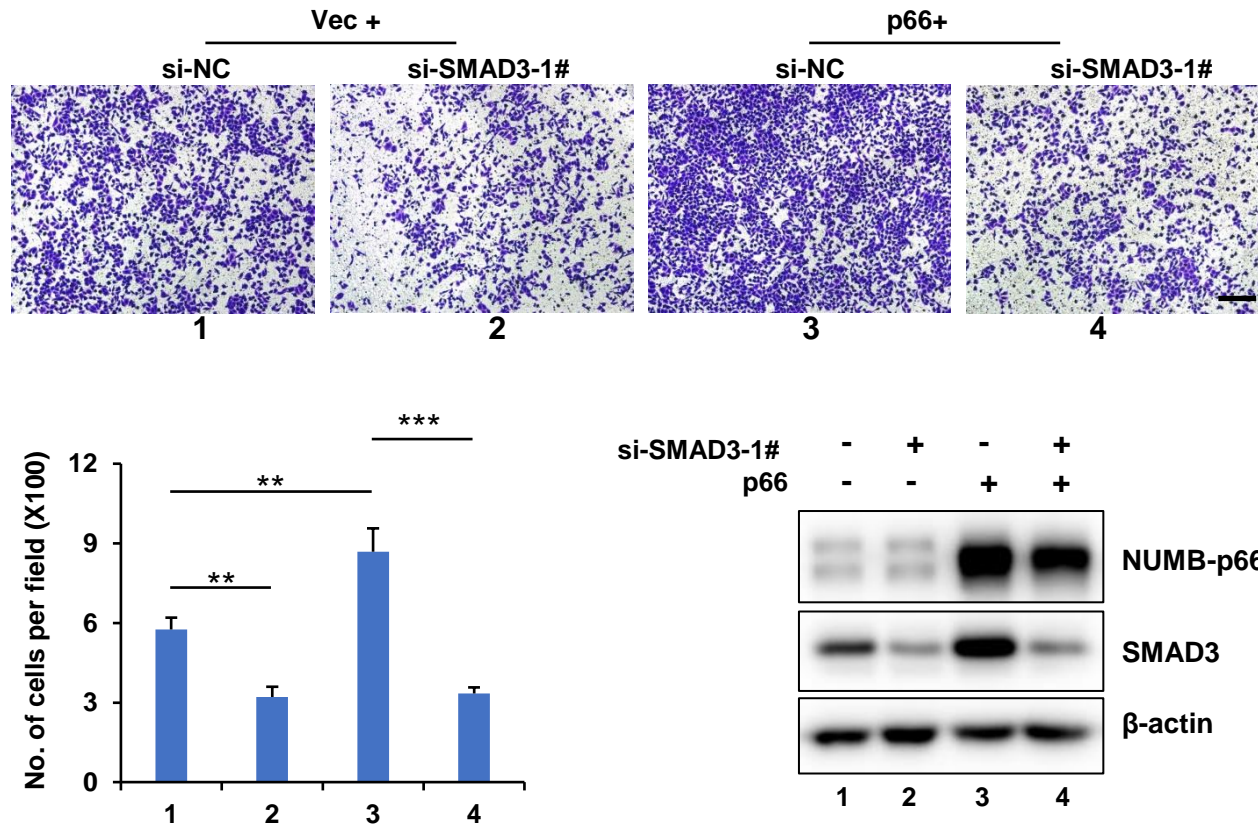

**Supplementary Figure S4. SMAD3 knockdown rescue the migration advantage seen in the NUMB-p66 overexpression.** HeLa cells were co-transfected with si-SMAD3 siRNA and NUMB p66 plasmid as indicated, followed by the cell migration assay. Representative images of migratory cells stained with crystal violet were shown on the top. Scale bar is 200  $\mu$ m. Quantification of migratory cells as mean  $\pm$  SD was shown on the left bottom. Western blot analysis was shown on the right bottom.

**Supplementary Table S1. siRNA sequences used for RNA interference.**

| siRNA              | Sense(5'-3')          | Antisense(5'-3')      |
|--------------------|-----------------------|-----------------------|
| si-NC              | UUCUCCGAACGUGUCACGUTT | ACGUGACACGUUCGGAGAATT |
| si-NUMB-p71/p72-#1 | CCCUGAUGCUGCUAACAAGTT | CUUGUUAGCAGCAUCAGGGTT |
| si-NUMB-p71/p72-#2 | CACUGACUCAGCCUCCAUTT  | AUGGAAGGCUGAGUCAGUGTT |
| si-NUMB-p65/p66-#1 | ACCUUCCAAGGGACCGAGUTT | ACUCGGUCCCUUGGAAGGUTT |
| si-NUMB-p65/p66-#2 | CCUUCCAAGGGACCGAGUGTT | CACUCGGUCCCUUGGAAGGTT |
| si-SMAD3-1#        | CUCCAAUGUCAACAGGAAUTT | AUUCCUGUUGACAUUGGAGTT |
| si-SMAD3-2#        | CUCCUACUACGAGCUGAACTT | GUUCAGCUCGUAGUAGGAGTT |
| si-Notch1          | CCAACUGCCAGACCAACAUTT | AUGUUGGUCUGGCAGUUGGTT |

## Supplementary Table S2. Primer sequences used for plasmid construction.

| Gene       | Sense(5'-3')                    | Antisense(5'-3')              |
|------------|---------------------------------|-------------------------------|
| SMAD3-HA   | GCTCTAGAATGTCGTCCATCCTGCCTTTC   | CGGAATTCCTAAGACACACTGGAACAGCG |
| SMAD3-Flag | CGGGATCCATGTCGTCCATCCTGCCTTTC   | CGGAATTCCTAAGACACACTGGAACAGCG |
| NUMB-p65   | GCTCTAGAATGAACAAATTACGGCAAAG    | CCGGAATTCTTAAAGTTCAATTTCAAACG |
| NUMB-p66   | GCTCTAGAATGAACAAATTACGGCAAAG    | CCGGAATTCTTAAAGTTCAATTTCAAACG |
| NUMB-p71   | GCTCTAGAATGAACAAATTACGGCAAAG    | CCGGAATTCTTAAAGTTCAATTTCAAACG |
| NUMB-p72   | GCTCTAGAATGAACAAATTACGGCAAAG    | CCGGAATTCTTAAAGTTCAATTTCAAACG |
| HA-p65     | CCGGAATTCCGATGAACAAATTACGGCAAAG | CCGCTCGAGTTAAAGTTCAATTTCAAACG |
| HA-p66     | CCGGAATTCCGATGAACAAATTACGGCAAAG | CCGCTCGAGTTAAAGTTCAATTTCAAACG |
| HA-71      | CCGGAATTCCGATGAACAAATTACGGCAAAG | CCGCTCGAGTTAAAGTTCAATTTCAAACG |
| HA-p72     | CCGGAATTCCGATGAACAAATTACGGCAAAG | CCGCTCGAGTTAAAGTTCAATTTCAAACG |

## Supplementary Table S3. shRNA sequences used for RNA interference.

| shRNA           | Sense(5'-3')/ Antisense(5'-3')                              |
|-----------------|-------------------------------------------------------------|
| sh-NC-F         | ccggAATTCTCCGAACGTGTCACGTCTCGAGACGTGACACGTTCCGAGAATTTTTTTg  |
| sh-NC-R         | aattcAAAAAAATTCTCCGAACGTGTCACGTCTCGAGACGTGACACGTTCCGAGAATT  |
| sh-p71/p72-#1-F | ccggAACCTGATGCTGCTAACAAGCTCGAGCTTGTTAGCAGCATCAGGGTTTTTTTg   |
| sh-p71/p72-#1-R | aattcAAAAAAACCCTGATGCTGCTAACAAGCTCGAGCTTGTTAGCAGCATCAGGGTT  |
| sh-p71/p72-#2-F | ccggAACACTGACTCAGCCTTCCATCTCGAGATGGAAGGCTGAGTCAGTGTTTTTTTg  |
| sh-p71/p72-#2-R | aattcAAAAAAACACTGACTCAGCCTTCCATCTCGAGATGGAAGGCTGAGTCAGTGTT  |
| sh-p65/p66-#1-F | ccggAAACCTTCCAAGGGACCGAGTCTCGAGACTCGGTCCCTTGGAAGGTTTTTTTTg  |
| sh-p65/p66-#1-R | aattcAAAAAAAACCTTCCAAGGGACCGAGTCTCGAGACTCGGTCCCTTGGAAGGTTT  |
| sh-p65/p66-#2-F | ccggAACCTTCCAAGGGACCGAGTGCTCGAGCACTCGGTCCCTTGGAAGGTTTTTTTg  |
| sh-p65/p66-#2-R | aattcAAAAAAAACCTTCCAAGGGACCGAGTGCTCGAGCACTCGGTCCCTTGGAAGGTT |

**Supplementary Table S4. Primer sequences used for p71/p72 and p65/p66 qPCR analysis.**

| <b>NUMB isoforms</b> | <b>Sense(5'-3')</b>          | <b>Antisense(5'-3')</b>     |
|----------------------|------------------------------|-----------------------------|
| <b>p71/p72</b>       | <b>CTAATGGCACTGACTCAGCC</b>  | <b>CCTTGTTAGCAGCATCAGGG</b> |
| <b>p65/p66</b>       | <b>CCTTCCAAGCTAATGGCACTG</b> | <b>CTTGTTAGCAGCATCAGGGG</b> |
